# Supplementary material for: HP-cyclodextrin modified sulphur quantum dots for the fluorescent cage sensing of p-NP by structural matching and PET: a new sensing approach
Source: Royal Society of Chemistry journal article supplement (doi:10.1039/d4tc02501f), 2024-01-01
Supplement: d4tc02501f1.pdf [file d4tc02501f1.pdf]

# HP-Cyclodextrin Modified Sulphur Quantum Dots for the Fluorescent Cage Sensing of *p*-NP by Structural Matching and PET: a New Sensing Approach

Yining Chang,<sup>a,b</sup> Ran He,<sup>a,b</sup> Runqiu Wang,<sup>a</sup> Yanli Wei<sup>\*a</sup> and Li Wang<sup>\*a</sup>

*a* Institute of Environmental Science, Shanxi University, Taiyuan, 030031, China

*b* School of Chemistry and Chemical Engineering, Shanxi University, Taiyuan, 030006, China

\*Corresponding author: Li Wang E-mail addresses: wangli@sxu.edu.cn (Li Wang)

## ***Supporting Information***

### TABLE OF CONTENTS

|                 |   |
|-----------------|---|
| Figure S1.....  | 2 |
| Figure S2.....  | 2 |
| Figure S3.....  | 2 |
| Figure S4.....  | 3 |
| Figure S5.....  | 3 |
| Figure S6.....  | 4 |
| Table S1.....   | 4 |
| Figure S7.....  | 5 |
| Figure S8.....  | 5 |
| Figure S9.....  | 5 |
| Figure S10..... | 6 |
| Figure S11..... | 6 |
| Figure S12..... | 7 |
| Figure S13..... | 7 |
| Table S2.....   | 7 |
| Table S3.....   | 7 |
| Table S4.....   | 8 |
| Table S5.....   | 8 |
| Table S6.....   | 9 |

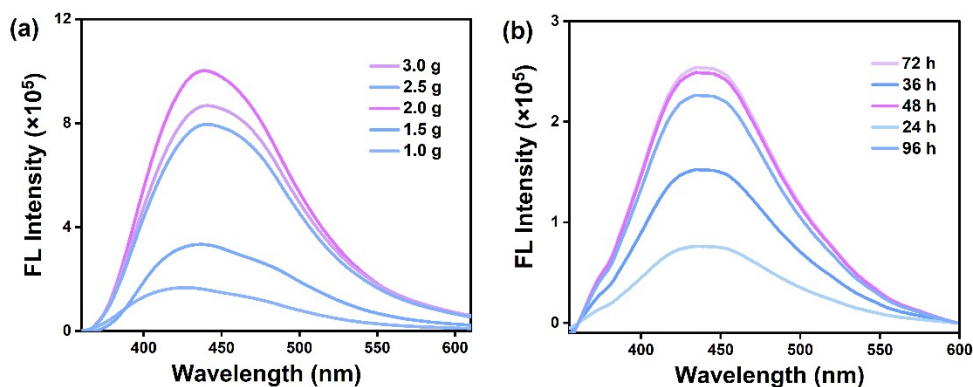

Figure S1 (a) The optimization of the addition amount of HP- $\beta$ -CD from fluorescent spectrum of SQDs at different concentrations of HP- $\beta$ -CD. (1.0 g, 1.5 g, 2.0 g, 2.5g, 3.0 g) (b) The optimization of reaction time at 24, 36, 48, 72 and 96 hours.

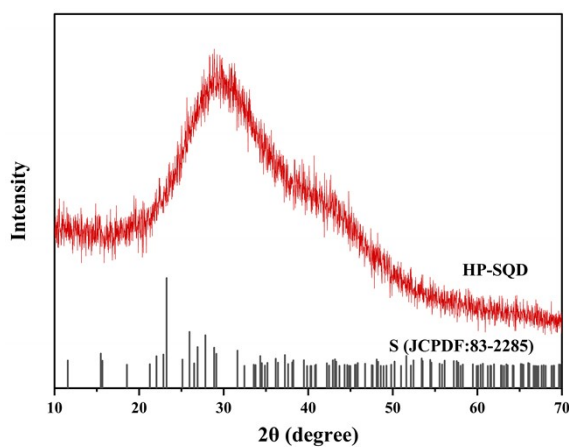

Figure S2 The XRD of HP-SQD.

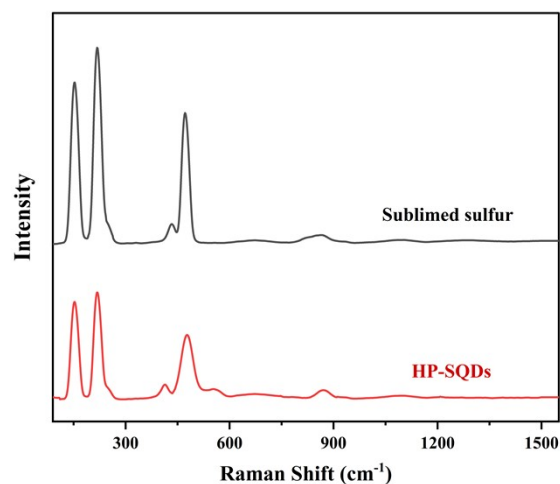

Figure S3 The Raman spectra of HP-SQD.

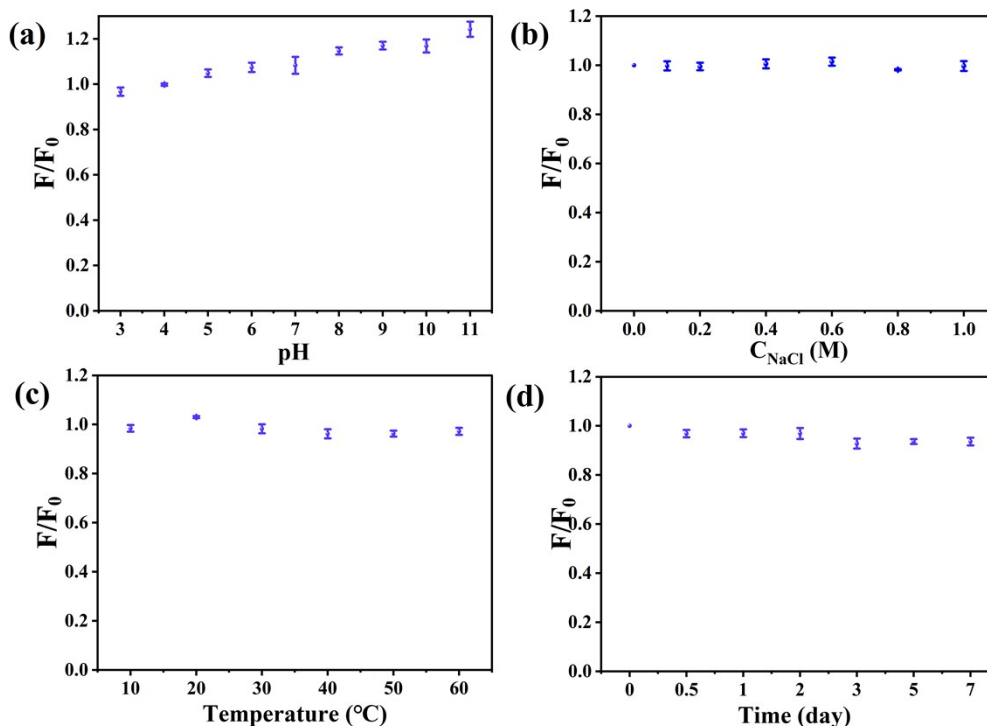

Figure S4 (a) The emission intensity ratio  $F/F_0$  of HP-SQDs at various pH from 3 to 11; (b) The effect of NaCl concentration on the intensity ratio  $F/F_0$  in the range from 0.10 to 1.0 M; (c) The effect of temperature change on the intensity ratio  $F/F_0$  from 25 to 60 °C; (d) The effect of Storage time at 4 °C during seven days after the preparation of HP-SQDs.

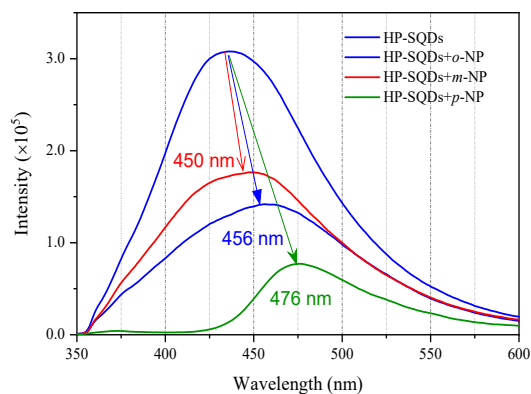

Figure S5 The comparison of emission quenching upon the formation of binding complexes of HP-SQDs with different nitrophenol isomers.

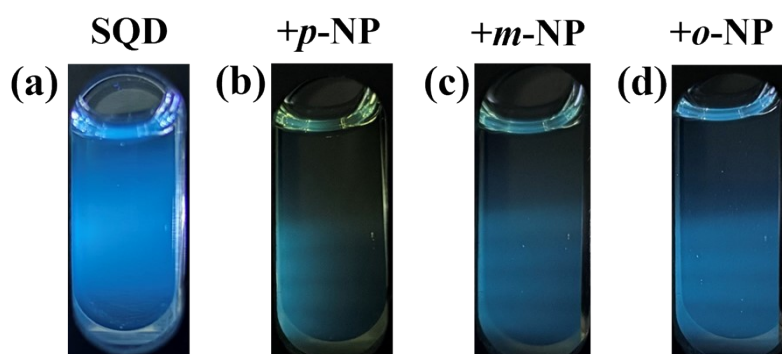

Figure S6 The photo of (a) HP-SQD, (b)SQD + *p*-NP, (c)SQD + *m*-NP, (d) SQD + *o*-NP. (under 365 nm)

Table S1 Compare with other sensors.

| Materials                         | Analytical methods | NPs          | Ranges           | LODs          | Sensing Mechanism           | References |
|-----------------------------------|--------------------|--------------|------------------|---------------|-----------------------------|------------|
| Graphene                          | Electrochemical    | <i>p</i> -NP | 0.5–1250 $\mu$ M | 0.012 $\mu$ M |                             | [1]        |
| CDs@PDA                           | Fluorescence       | <i>p</i> -NP | 2.0-34 $\mu$ M   | 3.4 $\mu$ M   | IFE                         | [2]        |
| N-CDs                             | Fluorescence       | <i>p</i> -NP | 1.0-250 $\mu$ M  | 0.40 $\mu$ M  | IFE and Static Quenching    | [3]        |
| MIP@CQDs                          | Fluorescence       | <i>p</i> -NP | 0-114 $\mu$ M    | 0.41 $\mu$ M  | IFE and Dynamic Quenching   | [4]        |
| perovskite QD                     | Fluorescence       | <i>p</i> -NP | 0-96 $\mu$ M     | 0.16 $\mu$ M  | FRET                        | [5]        |
| Tb-MOF                            | Fluorescence       | <i>p</i> -NP | 3.3-46.2 $\mu$ M | 0.415 $\mu$ M | IFE                         | [6]        |
| GF/Fe <sub>3</sub> O <sub>4</sub> | Colorimetric       | <i>p</i> -NP | 0.1-1000 $\mu$ M | 0.045 $\mu$ M |                             | [7]        |
| MWCNTs                            | Electrochemical    | <i>p</i> -NP | 1-200 $\mu$ M    | 0.41 $\mu$ M  |                             | [8]        |
| Nickel-based                      | Electrochemical    | <i>p</i> -NP | 0.01-20 nM       | 7.18 pM       |                             | [9]        |
| HP-SQDs                           | Fluorescence       | <i>p</i> -NP | 2.5-45 $\mu$ M   | 0.25 $\mu$ M  | Structural Matching and PET | This Work  |

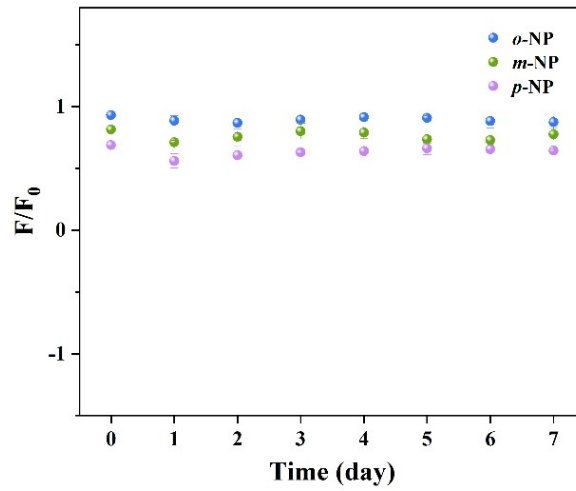

Figure S7 The fluorescence quenching ratio ( $F/F_0$ ) of the sensor within 7 d.

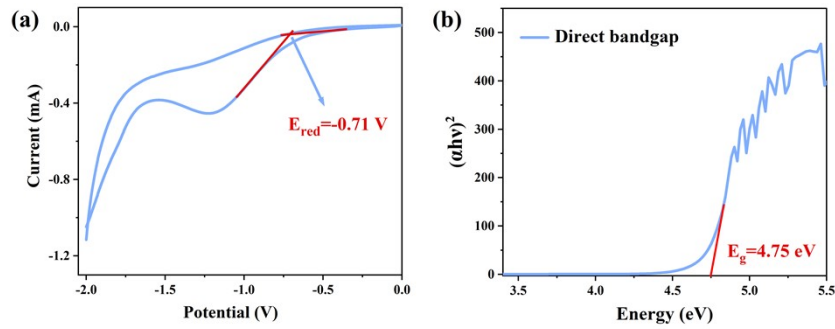

Figure S8 (a) Cyclic voltammogram of the HP-SQDs in 0.1 M  $K_2S_2O_8$ /PBS solution at 50 mV/s. (b) Optical bandgap of the HP-SQDs obtained from the UV-vis absorption spectrum.

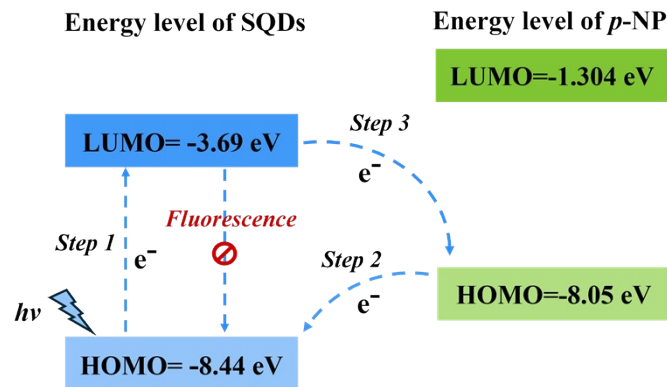

Figure S9 The  $E_{HOMO}$  and  $E_{LUMO}$  of HP-SQDs and  $p$ -NP.

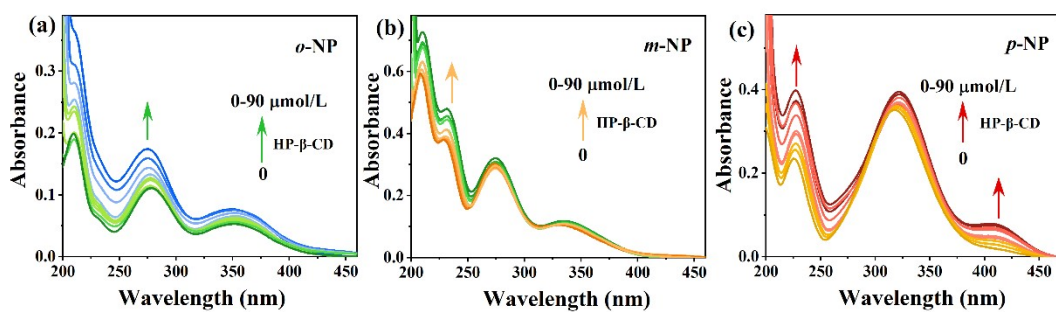

Figure S10 UV-Vis spectral changes (a) *o*-NP, (b) *m*-NP, and (c) *p*-NP at different concentration (0-90  $\mu\text{mol/L}$ ) of HP- $\beta$ -CD. The concentration of nitrophenol is fixed at 40  $\mu\text{mol/L}$ .

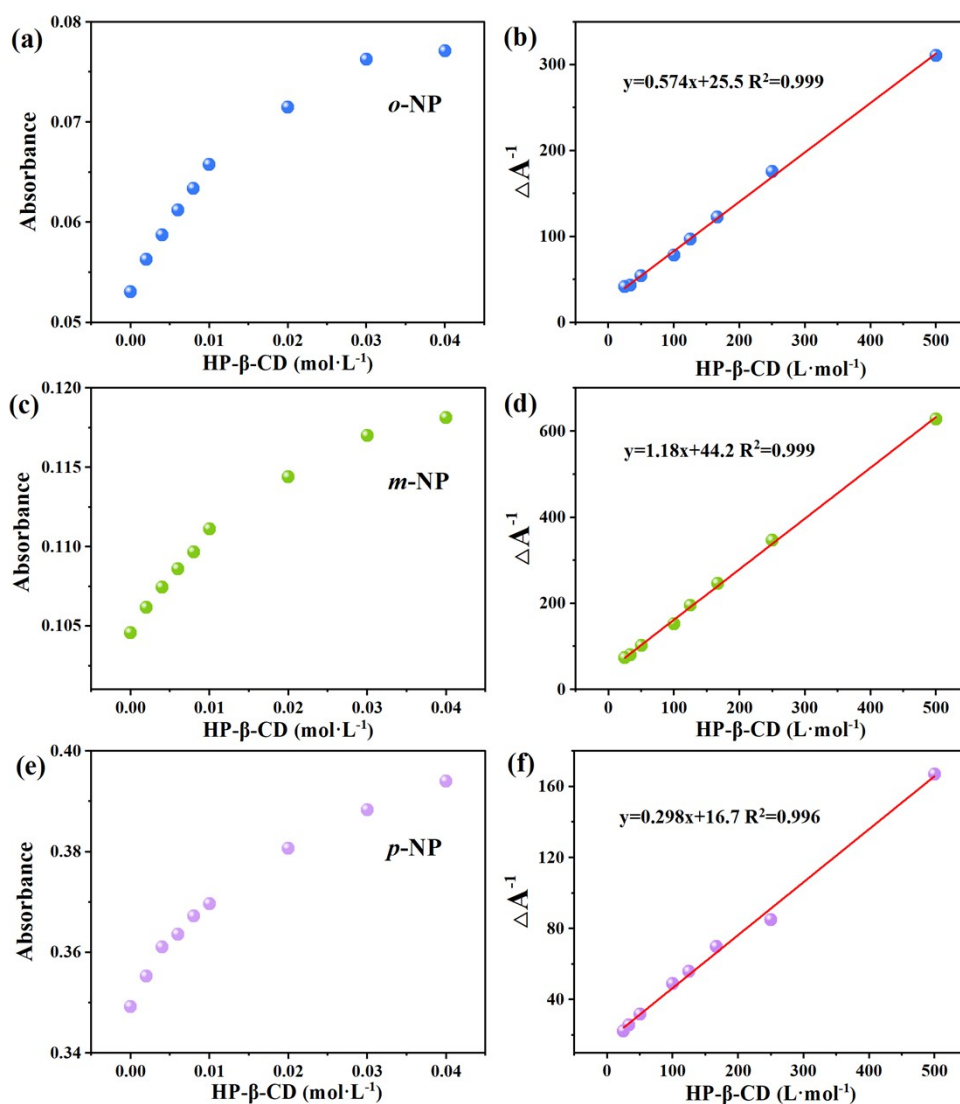

Figure S11 Absorbance changes of (a) *o*-NP, (c) *m*-NP, and (e) *p*-NP with the addition of various concentration of HP- $\beta$ -CD. The double-reciprocal plot of  $\Delta A^{-1}$  versus and  $[\text{HP-}\beta\text{-CD}]^{-1}$  for *o*-NP/HP- $\beta$ -CD (b), *m*-NP/HP- $\beta$ -CD (d), and *p*-NP/HP- $\beta$ -CD (f) system.

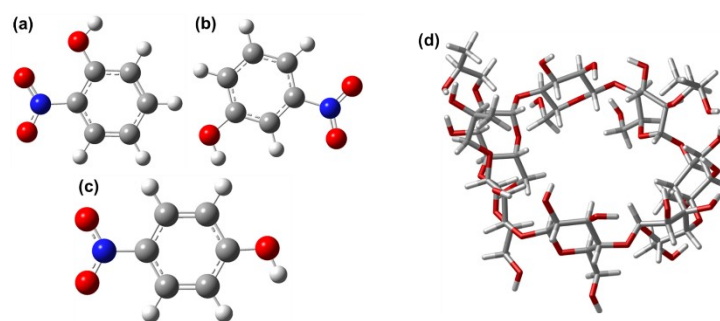

Figure S12 Geometrical structures of (a) *o*-NP, (b) *m*-NP, (c) *p*-NP and (d) 2-hydroxypropyl- $\beta$ -cyclodextrin molecules optimized at the M062X/6-31G(d) level of theory.

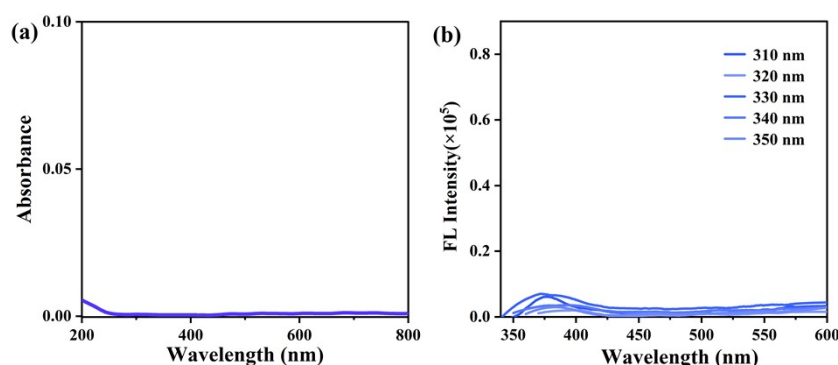

Figure S13 The (a) UV-Vis and (b) fluorescent spectra of mixture (same reaction conditions, no sulphur source added).

Table S2 Complexation energies and free enthalpies of inclusion complexes. All values are in kcal/mol.

|                            | <i>o</i> -NP | <i>m</i> -NP | <i>p</i> -NP |
|----------------------------|--------------|--------------|--------------|
| $\Delta E$                 | -21.54       | -22.15       | -24.94       |
| $\Delta E$ -BSSE corrected | -11.92       | -12.44       | -14.63       |
| $\Delta G$                 | -5.64        | -5.53        | -6.45        |

Table S3 Recoveries of nitrophenol isomers for the industrial wastewater (as compared with GC-MS).

| Detection    | Samples    | Spiked<br>( $\mu\text{mol/L}$ ) | Found<br>( $\mu\text{mol/L}$ ) | Recovery<br>(%) | RSD<br>(%)<br>(n=6) | GC-MS<br>( $\mu\text{mol/L}$ ) |
|--------------|------------|---------------------------------|--------------------------------|-----------------|---------------------|--------------------------------|
| <i>o</i> -NP | Industrial | 0                               | 0                              | -               | -                   | 0                              |
|              | Wastewater | 40                              | 39.20                          | 98.10           | 2.04                | 40.63                          |
|              | r          | 60                              | 59.03                          | 98.38           | 1.04                | 60.38                          |

|              |            |    |       |       |      |       |
|--------------|------------|----|-------|-------|------|-------|
|              |            | 80 | 78.62 | 98.28 | 1.36 | 80.26 |
| <i>m</i> -NP | Industrial | 0  | 0     | -     | -    | 0     |
|              |            | 40 | 41.11 | 102.8 | 1.43 | 41.35 |
|              | Wastewater | 60 | 61.15 | 102.0 | 0.61 | 61.50 |
|              |            | 80 | 80.18 | 100.2 | 1.89 | 80.73 |
| <i>p</i> -NP | Industrial | 0  | 2.32  |       | 0.21 | 2.57  |
|              |            | 40 | 43.98 | 103.9 | 0.56 | 43.16 |
|              | Wastewater | 60 | 63.96 | 102.6 | 0.80 | 63.67 |
|              |            | 80 | 83.71 | 101.7 | 1.31 | 83.93 |

Table S4 Recoveries of nitrophenol isomers for the lake water.

| Detection    | Samples    | Spiked<br>( $\mu\text{mol/L}$ ) | Found<br>( $\mu\text{mol/L}$ ) | Recovery<br>(%) | RSD (%)<br>(n=6) |
|--------------|------------|---------------------------------|--------------------------------|-----------------|------------------|
| <i>o</i> -NP | Lake water | 20                              | 19.68                          | 98.38           | 3.2              |
|              |            | 75                              | 74.60                          | 99.47           | 3.7              |
|              |            | 125                             | 127.85                         | 102.28          | 1.7              |
| <i>m</i> -NP | Lake water | 25                              | 24.57                          | 98.29           | 4.2              |
|              |            | 75                              | 74.71                          | 99.61           | 2.5              |
|              |            | 125                             | 128.44                         | 102.76          | 2.9              |
| <i>p</i> -NP | Lake water | 10                              | 10.09                          | 100.91          | 2.3              |
|              |            | 20                              | 19.97                          | 99.83           | 4.3              |
|              |            | 35                              | 34.44                          | 98.40           | 2.7              |

Table S5 Recoveries of nitrophenol isomers for the spiked tap water.

| Detection    | Samples      | Spiked<br>( $\mu\text{mol/L}$ ) | Found<br>( $\mu\text{mol/L}$ ) | Recovery<br>(%) | RSD (%)<br>(n=6) |
|--------------|--------------|---------------------------------|--------------------------------|-----------------|------------------|
| <i>o</i> -NP | Tap<br>water | 20                              | 20.42                          | 102.10          | 3.2              |
|              |              | 75                              | 75.53                          | 100.7           | 3.0              |
|              |              | 125                             | 124.6                          | 99.72           | 3.1              |
| <i>m</i> -NP | Tap<br>water | 25                              | 25.47                          | 101.9           | 3.6              |
|              |              | 75                              | 74.22                          | 98.96           | 2.1              |



|              |              |     |       |       |     |
|--------------|--------------|-----|-------|-------|-----|
|              |              | 125 | 124.6 | 99.66 | 3.3 |
| <i>p</i> -NP | Tap<br>water | 10  | 9.57  | 95.67 | 2.2 |
|              |              | 20  | 19.21 | 96.05 | 1.1 |
|              |              | 35  | 35.45 | 101.3 | 2.1 |

Table S6 Recovery of nitrophenol isomers from industrial wastewater (in the lab from the school of chemistry).

| Detection                  | Samples                       | Spiked<br>( $\mu\text{mol/L}$ ) | Found<br>( $\mu\text{mol/L}$ ) | Recovery<br>(%) | RSD<br>(%) (n=6) |
|----------------------------|-------------------------------|---------------------------------|--------------------------------|-----------------|------------------|
| <i>o</i> -NP<br>(Chem lab) | Industrial<br>Wastewater<br>r | 0                               | 0                              | -               | -                |
|                            |                               | 40                              | 38.67                          | 96.68           | 3.18             |
|                            |                               | 60                              | 61.40                          | 102.3           | 2.63             |
|                            |                               | 80                              | 83.18                          | 104.0           | 0.94             |
| <i>m</i> -NP<br>(Chem lab) | Industrial<br>Wastewater<br>r | 0                               | -                              | -               | -                |
|                            |                               | 40                              | 38.30                          | 95.75           | 2.64             |
|                            |                               | 60                              | 57.84                          | 96.40           | 1.01             |
|                            |                               | 80                              | 81.50                          | 101.9           | 3.84             |
| <i>p</i> -NP<br>(Chem lab) | Industrial<br>Wastewater<br>r | 0                               | 1.97                           | -               | 1.29             |
|                            |                               | 40                              | 40.64                          | 101.6           | 1.14             |
|                            |                               | 60                              | 62.05                          | 103.4           | 0.94             |
|                            |                               | 80                              | 81.51                          | 101.9           | 2.40             |

Quantum yield:

The relative quantum yield was determined according to the equation:

$$\phi_{un} = \phi_{std} \cdot \frac{F_{un}}{F_{std}} \cdot \frac{A_{std}}{A_{un}} \cdot \left( \frac{\eta_{un}}{\eta_{std}} \right)^2$$

Where std represents the reference of quine sulfate, and un represents the sample. F is the integral photon fluxes emitted from the sample (or the quantum yield standard) from the spectrally corrected spectra. A is the absorbance at the excitation wavelength, and  $\eta$  is the refractive index of solvent. Quinine sulfate solution (dissolved at 0.10 M H<sub>2</sub>SO<sub>4</sub>) was used as the standard ( $\phi_{std} = 0.54$ ,  $\eta = 1.33$ ). To minimize re-absorption effects, absorbances in the 10

mm fluorescence cuvette were kept less than 0.1 at the excitation wavelength. The quantum yield of SQDs is calculated as 0.030 from the above equation.

## References

1. Li, Y.; Ma, Y.; Lichtfouse, E.; Song, J.; Gong, R.; Zhang, J.; Wang, S.; Xiao, L., In situ electrochemical synthesis of graphene-poly(arginine) composite for p-nitrophenol monitoring. *Journal of Hazardous Materials* **2022**, *421*, 126718.
2. Liu, Q.; Zhao, F.; Shi, B.; Lu, C., Mussel-inspired polydopamine-encapsulated carbon dots with dual emission for detection of 4-nitrophenol and Fe(3). *Luminescence* **2021**, *36* (2), 431-442.
3. Das, D.; Dutta, R. K., N-Doped Carbon Dots Synthesized from Ethylene Glycol and  $\beta$ -Alanine for Detection of Cr(VI) and 4-Nitrophenol via Photoluminescence Quenching. *ACS Applied Nano Materials* **2021**, *4* (4), 3444-3454.
4. Wang, K.; Tan, L.; Zhang, Y.; Zhang, D.; Wang, N.; Wang, J., A molecular imprinted fluorescence sensor based on carbon quantum dots for selective detection of 4-nitrophenol in aqueous environments. *Marine Pollution Bulletin* **2023**, *187*, 114587.
5. Lin, Y.-C.; Lin, P.-Y.; Beck, D. E.; Hsu, Y.-C.; Cheng, S.-H.; Hsieh, S., Fluorescence quenching detection of p-nitrophenol in river water using functional perovskite quantum dots. *Environmental Technology & Innovation* **2023**, *32*, 103297.
6. Zhang, M.-Y.; Yi, F.-Y.; Liu, L.-J.; Yan, G.-P.; Liu, H.; Guo, J.-F., An europium(iii) metal-organic framework as a multi-responsive luminescent sensor for highly sensitive and selective detection of 4-nitrophenol and I<sup>-</sup> and Fe<sup>3+</sup> ions in water. *Dalton Transactions* **2021**, *50* (43), 15593-15601.
7. Qiu, N.; Liu, Y.; Xiang, M.; Lu, X.; Yang, Q.; Guo, R., A facile and stable colorimetric sensor based on three-dimensional graphene/mesoporous Fe<sub>3</sub>O<sub>4</sub> nanohybrid for highly sensitive and selective detection of p-nitrophenol. *Sensors and Actuators B: Chemical* **2018**, *266*, 86-94.
8. You, Y.; Li, S.-N.; Zou, J.; Xin, Y.-N.; Peng, S.; Liu, B.; Jiang, X.-Y.; Yu, J.-G., Ultrasonic-assisted self-assembly of a neodymium vanadate and hydroxylated multi-walled carbon nanotubes composite for electrochemical detection of p-nitrophenol. *Process Safety and Environmental Protection* **2023**, *175*, 834-844.
9. Lawaniya, S. D.; Pandey, G.; Yu, Y.; Awasthi, K., Efficient detection of p-nitrophenol via a polypyrrole flower-decorated nickel foam-based electrochemical sensor. *Nanoscale* **2024**.
